# Supplementary material
Source: Springer Nature journal article supplement (https://www.springermedizin.de/resource/supplementary/12891_2007_594_MOESM2_ESM.pdf/9506296)

# Isometric Muscle Strength

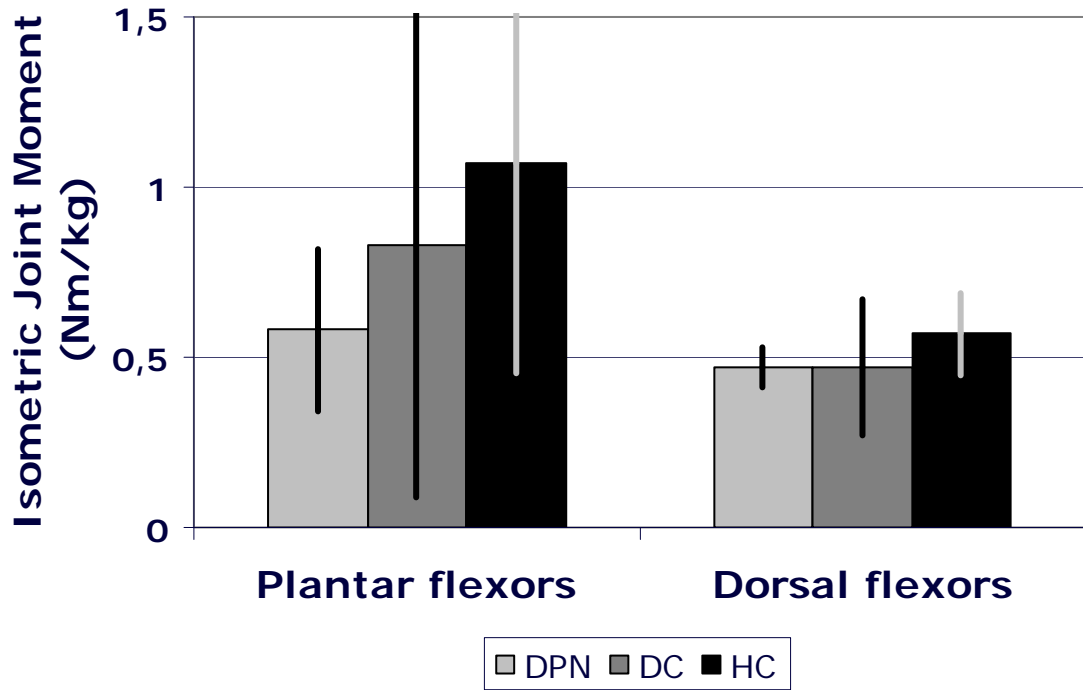

Supplement: MOESM2 [file 9506296]
